# Supplementary material for: Open‐source data reveal how collections‐based fungal diversity is sensitive to global change
Source: PubMed Central journal article supplement (PMC6426159; doi:10.1002/aps3.1227), 2019-03-12
Supplement: APS3-7-e01227-s001.pdf [file APS3-7-e01227-s001.pdf]

**APPENDIX S1.** Tukey’s honest significant difference (HSD) for multiple comparisons in the types of dynamic land-cover (ISAM-HYDE), and whether there is a significant difference in saprotrophic fungal diversity. The significant differences are shaded by values less than 0.05 (orange) or 0.01 (red).

| Comparison                                 |                                         | diff   | lwr    | upr    | p.adj       | Comparison            |                                          | diff   | lwr     | upr    | p.adj       |
|--------------------------------------------|-----------------------------------------|--------|--------|--------|-------------|-----------------------|------------------------------------------|--------|---------|--------|-------------|
| <b>Cropland</b>                            | <b>Boreal evergr. needleleaf forest</b> | -30.50 | -50.94 | -10.07 | <b>0.00</b> | Tundra                | Pastureland                              | 47.26  | -25.28  | 119.81 | 0.52        |
| <b>Grassland, steppe</b>                   | <b>Boreal evergr. needleleaf forest</b> | -41.08 | -62.07 | -20.09 | <b>0.00</b> | Tundra                | Temperate decid. broadleaf forest        | -31.39 | -116.06 | 53.28  | 0.96        |
| Grassland, steppe                          | Cropland                                | -10.58 | -25.35 | 4.19   | 0.38        | Tundra                | Temperate evergr. needleleaf forest      | 9.65   | -63.10  | 82.39  | 1.00        |
| <b>Pastureland</b>                         | <b>Boreal evergr. needleleaf forest</b> | -51.93 | -73.44 | -30.43 | <b>0.00</b> | Urbanland             | Boreal evergr. needleleaf forest         | -47.96 | -109.06 | 13.15  | 0.26        |
| <b>Pastureland</b>                         | <b>Cropland</b>                         | -21.43 | -36.92 | -5.95  | <b>0.00</b> | Urbanland             | Cropland                                 | -17.45 | -76.71  | 41.80  | 0.99        |
| Pastureland                                | Grassland, steppe                       | -10.85 | -27.06 | 5.36   | 0.48        | Urbanland             | Grassland, steppe                        | -6.87  | -66.32  | 52.58  | 1.00        |
| Temperate decid. broadleaf forest          | Boreal evergr. needleleaf forest        | 26.72  | -21.94 | 75.39  | 0.74        | Urbanland             | Pastureland                              | 3.98   | -55.65  | 63.61  | 1.00        |
| <b>Temperate decid. broadleaf forest</b>   | <b>Cropland</b>                         | 57.22  | 10.90  | 103.55 | <b>0.00</b> | <b>Urbanland</b>      | <b>Temperate decid. broadleaf forest</b> | -74.68 | -148.58 | -0.77  | <b>0.05</b> |
| <b>Temperate decid. broadleaf forest</b>   | <b>Grassland, steppe</b>                | 67.80  | 21.23  | 114.37 | <b>0.00</b> | Urbanland             | Temperate evergr. needleleaf forest      | -33.64 | -93.51  | 26.23  | 0.71        |
| <b>Temperate decid. broadleaf forest</b>   | <b>Pastureland</b>                      | 78.66  | 31.85  | 125.46 | <b>0.00</b> | Urbanland             | Tundra                                   | -43.28 | -135.67 | 49.10  | 0.87        |
| Temperate decid. broadleaf forest          | Temperate evergr. needleleaf forest     | 41.04  | -6.07  | 88.15  | 0.14        | <b>Wetlands, bogs</b> | <b>Boreal evergr. needleleaf forest</b>  | -50.09 | -88.27  | -11.91 | <b>0.00</b> |
| Temperate evergr. needleleaf forest        | Boreal evergr. needleleaf forest        | -14.32 | -36.47 | 7.83   | 0.53        | Wetlands, bogs        | Cropland                                 | -19.59 | -54.74  | 15.56  | 0.72        |
| Temperate evergr. needleleaf forest        | Cropland                                | 16.18  | -0.19  | 32.56  | 0.06        | Wetlands, bogs        | Grassland, steppe                        | -9.01  | -44.48  | 26.47  | 1.00        |
| <b>Temperate evergr. needleleaf forest</b> | <b>Grassland, steppe</b>                | 26.76  | 9.70   | 43.83  | <b>0.00</b> | Wetlands, bogs        | Pastureland                              | 1.84   | -33.93  | 37.62  | 1.00        |
| <b>Temperate evergr. needleleaf forest</b> | <b>Pastureland</b>                      | 37.62  | 19.93  | 55.31  | <b>0.00</b> | <b>Wetlands, bogs</b> | <b>Temperate decid. broadleaf forest</b> | -76.81 | -133.26 | -20.37 | <b>0.00</b> |
| Tundra                                     | Boreal evergr. needleleaf forest        | -4.67  | -78.43 | 69.09  | 1.00        | Wetlands, bogs        | Temperate evergr. needleleaf forest      | -35.77 | -71.95  | 0.40   | 0.06        |
| Tundra                                     | Cropland                                | 25.83  | -46.41 | 98.07  | 0.97        | Wetlands, bogs        | Tundra                                   | -45.42 | -124.53 | 33.69  | 0.69        |
| Tundra                                     | Grassland, steppe                       | 36.41  | -35.99 | 108.81 | 0.82        | Wetlands, bogs        | Urbanland                                | -2.13  | -69.60  | 65.33  | 1.00        |
