# Supplementary material for: Open‐source data reveal how collections‐based fungal diversity is sensitive to global change
Source: PubMed Central journal article supplement (PMC6426159; doi:10.1002/aps3.1227), 2019-03-12
Supplement: APS3-7-e01227-s002.pdf [file APS3-7-e01227-s002.pdf]

**APPENDIX S2.** Tukey’s honest significant difference (HSD) for multiple comparisons in the types of static land-cover (CLC3), and whether there is a significant difference in saprotrophic fungal diversity. The significant differences are shaded by values less than 0.05 (orange) or 0.01 (red).

| Comparison                 |                                 | diff          | lwr           | upr           | p.adj       | Comparison                |                           | diff          | lwr           | upr           | p.adj       |
|----------------------------|---------------------------------|---------------|---------------|---------------|-------------|---------------------------|---------------------------|---------------|---------------|---------------|-------------|
| Arable land (non-irrig.)   | Ag. w/natural lands             | 5.95          | -40.59        | 52.49         | 1.00        | <b>Pastures</b>           | <b>Mixed forest</b>       | <b>-42.33</b> | <b>-66.61</b> | <b>-18.05</b> | <b>0.00</b> |
| Broadleaved forest         | Ag. w/natural lands             | 29.05         | -18.33        | 76.44         | 0.68        | Pastures                  | Moors and heathland       | -0.47         | -39.32        | 38.39         | 1.00        |
| <b>Broadleaved forest</b>  | <b>Arable land (non-irrig.)</b> | <b>23.10</b>  | <b>3.48</b>   | <b>42.73</b>  | <b>0.01</b> | Pastures                  | Natural grasslands        | 7.31          | -40.80        | 55.43         | 1.00        |
| Coniferous forest          | Ag. w/natural lands             | 23.19         | -22.88        | 69.26         | 0.89        | Peat bogs                 | Ag. w/natural lands       | -40.56        | -130.29       | 49.17         | 0.94        |
| <b>Coniferous forest</b>   | <b>Arable land (non-irrig.)</b> | <b>17.24</b>  | <b>1.03</b>   | <b>33.45</b>  | <b>0.03</b> | Peat bogs                 | Arable land (non-irrig.)  | -46.51        | -125.20       | 32.18         | 0.73        |
| Coniferous forest          | Broadleaved forest              | -5.86         | -24.36        | 12.63         | 1.00        | Peat bogs                 | Broadleaved forest        | -69.61        | -148.80       | 9.58          | 0.15        |
| Cultivated patterns        | Ag. w/natural lands             | 15.10         | -42.83        | 73.02         | 1.00        | Peat bogs                 | Coniferous forest         | -63.75        | -142.16       | 14.67         | 0.24        |
| Cultivated patterns        | Arable land (non-irrig.)        | 9.15          | -29.52        | 47.81         | 1.00        | Peat bogs                 | Cultivated patterns       | -55.65        | -141.57       | 30.26         | 0.60        |
| Cultivated patterns        | Broadleaved forest              | -13.96        | -53.63        | 25.72         | 0.99        | Peat bogs                 | Mixed forest              | -68.81        | -148.35       | 10.73         | 0.17        |
| Cultivated patterns        | Coniferous forest               | -8.09         | -46.20        | 30.01         | 1.00        | Peat bogs                 | Moors and heathland       | -26.95        | -112.07       | 58.18         | 1.00        |
| Mixed forest               | Ag. w/natural lands             | 28.25         | -19.71        | 76.22         | 0.73        | Peat bogs                 | Natural grasslands        | -19.17        | -108.90       | 70.57         | 1.00        |
| <b>Mixed forest</b>        | <b>Arable land (non-irrig.)</b> | <b>22.30</b>  | <b>1.32</b>   | <b>43.29</b>  | <b>0.03</b> | Peat bogs                 | Pastures                  | -26.48        | -106.11       | 53.15         | 0.99        |
| Mixed forest               | Broadleaved forest              | -0.80         | -23.60        | 22.00         | 1.00        | Transition wood/shrubland | Ag. w/natural lands       | 28.70         | -37.84        | 95.25         | 0.96        |
| Mixed forest               | Coniferous forest               | 5.06          | -14.87        | 25.00         | 1.00        | Transition wood/shrubland | Arable land (non-irrig.)  | 22.75         | -27.93        | 73.43         | 0.95        |
| Mixed forest               | Cultivated patterns             | 13.16         | -27.21        | 53.52         | 1.00        | Transition wood/shrubland | Broadleaved forest        | -0.35         | -51.81        | 51.11         | 1.00        |
| Moors and heathland        | Ag. w/natural lands             | -13.61        | -70.37        | 43.14         | 1.00        | Transition wood/shrubland | Coniferous forest         | 5.51          | -44.74        | 55.77         | 1.00        |
| Moors and heathland        | Arable land (non-irrig.)        | -19.56        | -56.45        | 17.32         | 0.85        | Transition wood/shrubland | Cultivated patterns       | 13.61         | -47.69        | 74.91         | 1.00        |
| <b>Moors and heathland</b> | <b>Broadleaved forest</b>       | <b>-42.67</b> | <b>-80.61</b> | <b>-4.72</b>  | <b>0.01</b> | Transition wood/shrubland | Mixed forest              | 0.45          | -51.54        | 52.44         | 1.00        |
| <b>Moors and heathland</b> | <b>Coniferous forest</b>        | <b>-36.80</b> | <b>-73.10</b> | <b>-0.50</b>  | <b>0.04</b> | Transition wood/shrubland | Moors and heathland       | 42.32         | -17.88        | 102.51        | 0.47        |
| Moors and heathland        | Cultivated patterns             | -28.71        | -79.20        | 21.79         | 0.78        | Transition wood/shrubland | Natural grasslands        | 50.10         | -16.45        | 116.64        | 0.36        |
| <b>Moors and heathland</b> | <b>Mixed forest</b>             | <b>-41.87</b> | <b>-80.54</b> | <b>-3.20</b>  | <b>0.02</b> | Transition wood/shrubland | Pastures                  | 42.78         | -9.35         | 94.91         | 0.23        |
| Natural grasslands         | Ag. w/natural lands             | -21.39        | -84.84        | 42.06         | 0.99        | Transition wood/shrubland | Peat bogs                 | 69.26         | -22.69        | 161.21        | 0.36        |
| Natural grasslands         | Arable land (non-irrig.)        | -27.34        | -73.88        | 19.20         | 0.74        | Urban fabric              | Ag. w/natural lands       | 11.82         | -43.13        | 66.77         | 1.00        |
| <b>Natural grasslands</b>  | <b>Broadleaved forest</b>       | <b>-50.45</b> | <b>-97.83</b> | <b>-3.06</b>  | <b>0.03</b> | Urban fabric              | Arable land (non-irrig.)  | 5.87          | -28.18        | 39.92         | 1.00        |
| Natural grasslands         | Coniferous forest               | -44.58        | -90.66        | 1.49          | 0.07        | Urban fabric              | Broadleaved forest        | -17.23        | -52.43        | 17.96         | 0.90        |
| Natural grasslands         | Cultivated patterns             | -36.49        | -94.41        | 21.43         | 0.64        | Urban fabric              | Coniferous forest         | -11.37        | -44.78        | 22.04         | 0.99        |
| <b>Natural grasslands</b>  | <b>Mixed forest</b>             | <b>-49.65</b> | <b>-97.61</b> | <b>-1.68</b>  | <b>0.04</b> | Urban fabric              | Cultivated patterns       | -3.28         | -51.74        | 45.19         | 1.00        |
| Natural grasslands         | Moors and heathland             | -7.78         | -64.53        | 48.97         | 1.00        | Urban fabric              | Mixed forest              | -16.43        | -52.41        | 19.54         | 0.94        |
| Pastures                   | Ag. w/natural lands             | -14.08        | -62.19        | 34.03         | 1.00        | Urban fabric              | Moors and heathland       | 25.43         | -21.62        | 72.49         | 0.83        |
| Pastures                   | Arable land (non-irrig.)        | -20.03        | -41.36        | 1.30          | 0.09        | Urban fabric              | Natural grasslands        | 33.21         | -21.74        | 88.16         | 0.70        |
| <b>Pastures</b>            | <b>Broadleaved forest</b>       | <b>-43.13</b> | <b>-66.25</b> | <b>-20.02</b> | <b>0.00</b> | Urban fabric              | Pastures                  | 25.90         | -10.27        | 62.07         | 0.44        |
| <b>Pastures</b>            | <b>Coniferous forest</b>        | <b>-37.27</b> | <b>-57.56</b> | <b>-16.98</b> | <b>0.00</b> | Urban fabric              | Peat bogs                 | 52.38         | -31.56        | 136.32        | 0.66        |
| Pastures                   | Cultivated patterns             | -29.18        | -69.72        | 11.37         | 0.43        | Urban fabric              | Transition wood/shrubland | -16.88        | -75.38        | 41.62         | 1.00        |
