# Supplementary material for: Open‐source data reveal how collections‐based fungal diversity is sensitive to global change
Source: PubMed Central journal article supplement (PMC6426159; doi:10.1002/aps3.1227), 2019-03-12
Supplement: APS3-7-e01227-s003.pdf [file APS3-7-e01227-s003.pdf]

**APPENDIX S3.** Tukey’s honest significant difference (HSD) for multiple comparisons in the types of dynamic land-cover (ISAM-HYDE), and whether there is a significant difference in ectomycorrhizal fungal diversity. The significant differences are shaded by values less than 0.05 (orange) or 0.01 (red).

| Comparison                                 |                                         | diff   | lwr    | upr    | p.adj       | Comparison               |                                            | diff    | lwr     | upr    | p.adj       |
|--------------------------------------------|-----------------------------------------|--------|--------|--------|-------------|--------------------------|--------------------------------------------|---------|---------|--------|-------------|
| <b>Cropland</b>                            | <b>Boreal evergr. needleleaf forest</b> | -46.11 | -70.68 | -21.53 | <b>0.00</b> | Tundra                   | Pastureland                                | 88.52   | -18.11  | 195.16 | 0.19        |
| <b>Grassland, steppe</b>                   | <b>Boreal evergr. needleleaf forest</b> | -54.44 | -80.37 | -28.50 | <b>0.00</b> | Tundra                   | Temperate decid. broadleaf forest          | 34.86   | -71.79  | 141.51 | 0.98        |
| Grassland, steppe                          | Cropland                                | -8.33  | -25.77 | 9.10   | 0.86        | Tundra                   | Temperate evergr. needleleaf forest        | 18.77   | -97.07  | 134.60 | 1.00        |
| <b>Pastureland</b>                         | <b>Boreal evergr. needleleaf forest</b> | -62.06 | -88.05 | -36.06 | <b>0.00</b> | <b>Urbanland</b>         | <b>Boreal evergr. needleleaf forest</b>    | -80.81  | -145.72 | -15.90 | <b>0.00</b> |
| Pastureland                                | Cropland                                | -15.95 | -33.48 | 1.58   | 0.11        | Urbanland                | Cropland                                   | -34.70  | -96.71  | 27.30  | 0.72        |
| Pastureland                                | Grassland, steppe                       | -7.62  | -27.01 | 11.77  | 0.95        | Urbanland                | Grassland, steppe                          | -26.37  | -88.93  | 36.19  | 0.93        |
| Temperate decid. broadleaf forest          | Boreal evergr. needleleaf forest        | -8.39  | -34.45 | 17.66  | 0.99        | Urbanland                | Pastureland                                | -18.75  | -81.34  | 43.83  | 0.99        |
| <b>Temperate decid. broadleaf forest</b>   | <b>Cropland</b>                         | 37.71  | 20.09  | 55.33  | <b>0.00</b> | <b>Urbanland</b>         | <b>Temperate decid. broadleaf forest</b>   | -72.41  | -135.02 | -9.80  | <b>0.01</b> |
| <b>Temperate decid. broadleaf forest</b>   | <b>Grassland, steppe</b>                | 46.04  | 26.57  | 65.51  | <b>0.00</b> | <b>Urbanland</b>         | <b>Temperate evergr. needleleaf forest</b> | -88.51  | -165.73 | -11.28 | <b>0.01</b> |
| <b>Temperate decid. broadleaf forest</b>   | <b>Pastureland</b>                      | 53.66  | 34.11  | 73.22  | <b>0.00</b> | Urbanland                | Tundra                                     | -107.28 | -229.38 | 14.83  | 0.14        |
| Temperate evergr. needleleaf forest        | Boreal evergr. needleleaf forest        | 7.70   | -44.48 | 59.88  | 1.00        | <b>Wetlands and bogs</b> | <b>Boreal evergr. needleleaf forest</b>    | -59.40  | -107.87 | -10.93 | <b>0.00</b> |
| <b>Temperate evergr. needleleaf forest</b> | <b>Cropland</b>                         | 53.80  | 5.29   | 102.32 | <b>0.02</b> | Wetlands and bogs        | Cropland                                   | -13.29  | -57.81  | 31.22  | 0.99        |
| <b>Temperate evergr. needleleaf forest</b> | <b>Grassland, steppe</b>                | 62.14  | 12.92  | 111.36 | <b>0.00</b> | Wetlands and bogs        | Grassland, steppe                          | -4.96   | -50.24  | 40.31  | 1.00        |
| <b>Temperate evergr. needleleaf forest</b> | <b>Pastureland</b>                      | 69.76  | 20.50  | 119.01 | <b>0.00</b> | Wetlands and bogs        | Pastureland                                | 2.66    | -42.65  | 47.97  | 1.00        |
| Temperate evergr. needleleaf forest        | Temperate decid. broadleaf forest       | 16.09  | -33.19 | 65.38  | 0.98        | <b>Wetlands and bogs</b> | <b>Temperate decid. broadleaf forest</b>   | -51.01  | -96.35  | -5.66  | <b>0.01</b> |
| Tundra                                     | Boreal evergr. needleleaf forest        | 26.47  | -81.55 | 134.48 | 1.00        | <b>Wetlands and bogs</b> | <b>Temperate evergr. needleleaf forest</b> | -67.10  | -131.13 | -3.07  | <b>0.03</b> |
| Tundra                                     | Cropland                                | 72.57  | -33.73 | 178.87 | 0.45        | Wetlands and bogs        | Tundra                                     | -85.87  | -200.08 | 28.35  | 0.32        |
| Tundra                                     | Grassland, steppe                       | 80.90  | -25.72 | 187.53 | 0.30        | Wetlands and bogs        | Urbanland                                  | 21.41   | -53.36  | 96.18  | 0.99        |
