# Supplementary material for: Open‐source data reveal how collections‐based fungal diversity is sensitive to global change
Source: PubMed Central journal article supplement (PMC6426159; doi:10.1002/aps3.1227), 2019-03-12
Supplement: APS3-7-e01227-s004.pdf [file APS3-7-e01227-s004.pdf]

**APPENDIX S4.** Tukey’s honest significant difference (HSD) for multiple comparisons in the types of dynamic land-cover, and whether there is a significant difference in ectomycorrhizal fungal diversity. The significant differences are shaded by values less than 0.05 (orange) or 0.01 (red).

| Comparison                |                                 | diff   | lwr     | upr   | p.adj       | Comparison                |                           | diff   | lwr     | upr    | p.adj       |
|---------------------------|---------------------------------|--------|---------|-------|-------------|---------------------------|---------------------------|--------|---------|--------|-------------|
| Arable land (non-irrig.)  | Ag. w/natural lands             | 0.40   | -50.73  | 51.52 | 1.00        | Pastures                  | Ag. w/natural lands       | -15.12 | -69.66  | 39.42  | 1.00        |
| Broadleaved forest        | Ag. w/natural lands             | 25.63  | -26.45  | 77.70 | 0.88        | Pastures                  | Arable land (non-irrig.)  | -15.52 | -43.63  | 12.60  | 0.79        |
| <b>Broadleaved forest</b> | <b>Arable land (non-irrig.)</b> | 25.23  | 2.25    | 48.20 | <b>0.02</b> | <b>Pastures</b>           | <b>Broadleaved forest</b> | -40.74 | -70.55  | -10.93 | <b>0.00</b> |
| Coniferous forest         | Ag. w/natural lands             | 29.76  | -20.67  | 80.19 | 0.71        | <b>Pastures</b>           | <b>Coniferous forest</b>  | -44.88 | -71.71  | -18.05 | <b>0.00</b> |
| <b>Coniferous forest</b>  | <b>Arable land (non-irrig.)</b> | 29.36  | 10.42   | 48.30 | <b>0.00</b> | Pastures                  | Cultivated patterns       | -19.06 | -70.36  | 32.24  | 0.98        |
| Coniferous forest         | Broadleaved forest              | 4.14   | -17.24  | 25.51 | 1.00        | <b>Pastures</b>           | <b>Mixed forest</b>       | -51.75 | -82.82  | -20.69 | <b>0.00</b> |
| Cultivated patterns       | Ag. w/natural lands             | 3.94   | -62.81  | 70.69 | 1.00        | Pastures                  | Moors and heathland       | -24.43 | -83.20  | 34.35  | 0.96        |
| Cultivated patterns       | Arable land (non-irrig.)        | 3.54   | -44.11  | 51.20 | 1.00        | Pastures                  | Natural grasslands        | 28.25  | -45.06  | 101.55 | 0.98        |
| Cultivated patterns       | Broadleaved forest              | -21.69 | -70.36  | 26.99 | 0.94        | Transition wood/shrubland | Ag. w/natural lands       | 42.57  | -34.88  | 120.01 | 0.79        |
| Cultivated patterns       | Coniferous forest               | -25.82 | -72.73  | 21.09 | 0.79        | Transition wood/shrubland | Arable land (non-irrig.)  | 42.17  | -19.58  | 103.92 | 0.50        |
| Mixed forest              | Ag. w/natural lands             | 36.64  | -16.16  | 89.44 | 0.47        | Transition wood/shrubland | Broadleaved forest        | 16.94  | -45.60  | 79.48  | 1.00        |
| <b>Mixed forest</b>       | <b>Arable land (non-irrig.)</b> | 36.24  | 11.66   | 60.81 | <b>0.00</b> | Transition wood/shrubland | Coniferous forest         | 12.81  | -48.37  | 73.98  | 1.00        |
| Mixed forest              | Broadleaved forest              | 11.01  | -15.48  | 37.50 | 0.96        | Transition wood/shrubland | Cultivated patterns       | 38.63  | -36.57  | 113.82 | 0.85        |
| Mixed forest              | Coniferous forest               | 6.87   | -16.21  | 29.96 | 1.00        | Transition wood/shrubland | Mixed forest              | 5.93   | -57.22  | 69.08  | 1.00        |
| Mixed forest              | Cultivated patterns             | 32.70  | -16.75  | 82.15 | 0.55        | Transition wood/shrubland | Moors and heathland       | 33.26  | -47.22  | 113.74 | 0.96        |
| Moors and heathland       | Ag. w/natural lands             | 9.31   | -63.34  | 81.96 | 1.00        | Transition wood/shrubland | Natural grasslands        | 85.93  | -5.70   | 177.56 | 0.09        |
| Moors and heathland       | Arable land (non-irrig.)        | 8.91   | -46.71  | 64.53 | 1.00        | Transition wood/shrubland | Pastures                  | 57.69  | -6.92   | 122.29 | 0.13        |
| Moors and heathland       | Broadleaved forest              | -16.32 | -72.81  | 40.18 | 1.00        | Urban fabric              | Ag. w/natural lands       | -1.09  | -63.04  | 60.86  | 1.00        |
| Moors and heathland       | Coniferous forest               | -20.45 | -75.43  | 34.52 | 0.98        | Urban fabric              | Arable land (non-irrig.)  | -1.49  | -42.16  | 39.18  | 1.00        |
| Moors and heathland       | Cultivated patterns             | 5.37   | -64.88  | 75.62 | 1.00        | Urban fabric              | Broadleaved forest        | -26.72 | -68.58  | 15.14  | 0.60        |
| Moors and heathland       | Mixed forest                    | -27.33 | -84.49  | 29.84 | 0.90        | Urban fabric              | Coniferous forest         | -30.85 | -70.64  | 8.94   | 0.30        |
| Natural grasslands        | Ag. w/natural lands             | -43.36 | -128.20 | 41.47 | 0.86        | Urban fabric              | Cultivated patterns       | -5.03  | -64.15  | 54.09  | 1.00        |
| Natural grasslands        | Arable land (non-irrig.)        | -43.76 | -114.56 | 27.04 | 0.65        | Urban fabric              | Mixed forest              | -37.73 | -80.49  | 5.03   | 0.14        |
| Natural grasslands        | Broadleaved forest              | -68.99 | -140.48 | 2.50  | 0.07        | Urban fabric              | Moors and heathland       | -10.40 | -76.11  | 55.32  | 1.00        |
| <b>Natural grasslands</b> | <b>Coniferous forest</b>        | -73.13 | -143.42 | -2.83 | <b>0.03</b> | Urban fabric              | Natural grasslands        | 42.27  | -36.70  | 121.25 | 0.82        |
| Natural grasslands        | Cultivated patterns             | -47.30 | -130.10 | 35.49 | 0.75        | Urban fabric              | Pastures                  | 14.03  | -30.86  | 58.92  | 1.00        |
| <b>Natural grasslands</b> | <b>Mixed forest</b>             | -80.00 | -152.02 | -7.98 | <b>0.02</b> | Urban fabric              | Transition wood/shrubland | -43.66 | -114.63 | 27.32  | 0.65        |
| Natural grasslands        | Moors and heathland             | -52.67 | -140.29 | 34.95 | 0.68        |                           |                           |        |         |        |             |
