# Supplementary material for: Open‐source data reveal how collections‐based fungal diversity is sensitive to global change
Source: PubMed Central journal article supplement (PMC6426159; doi:10.1002/aps3.1227), 2019-03-12

**APPENDIX S15.** The mean and range in each of the explanatory variables connected to the fruiting records, for the final consensus model for ectomycorrhizal fungi, between each of the land-use types of the dynamic (ISAM-HYDE) variable. All variables are scaled.

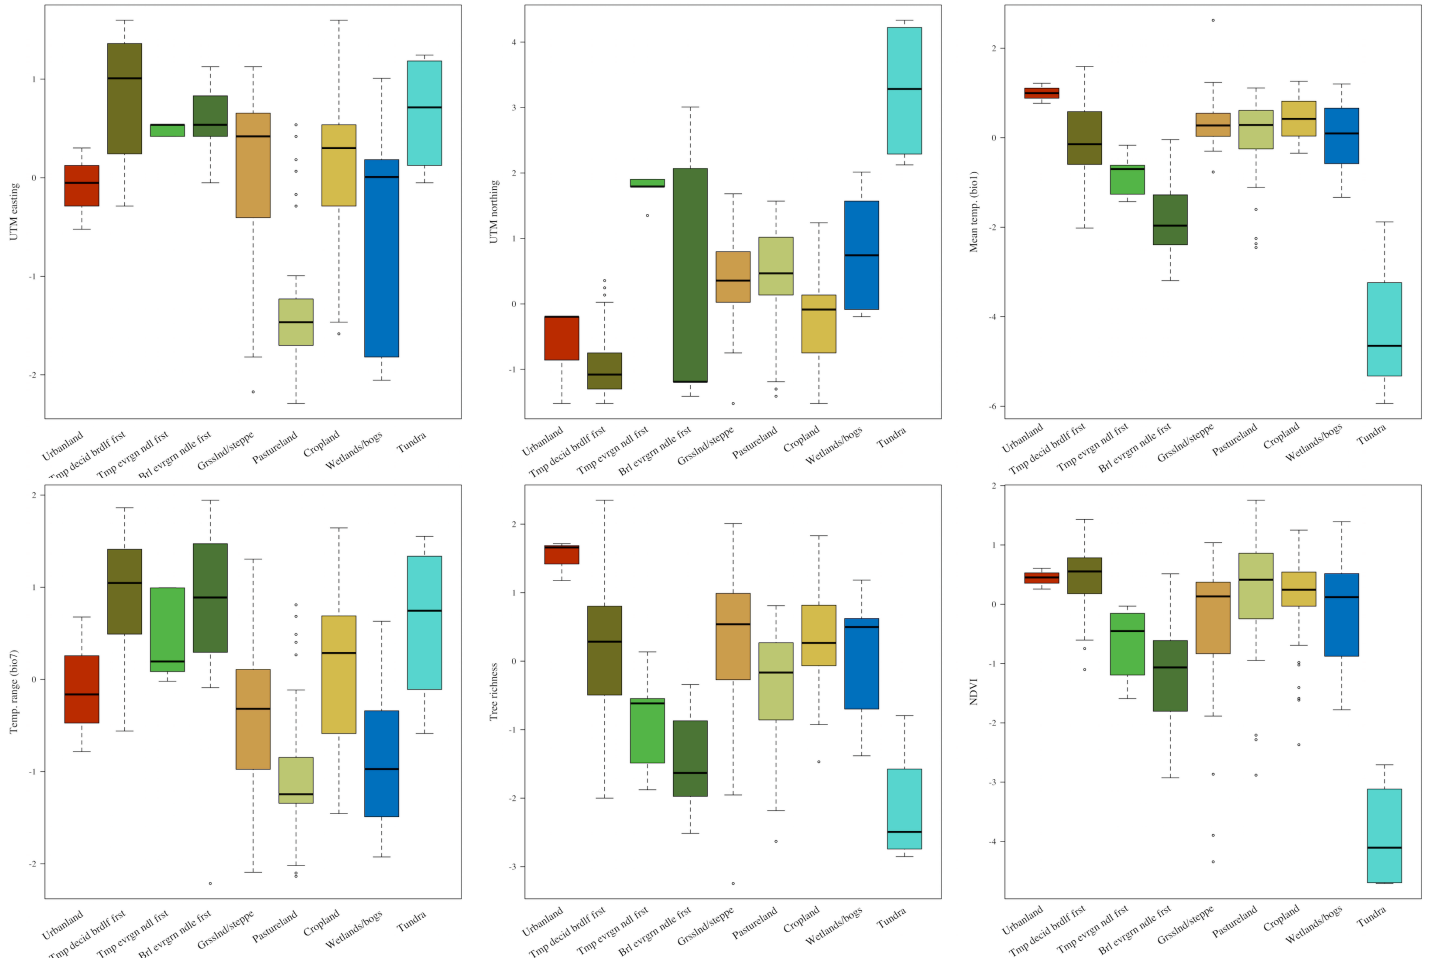

Supplement: APS3-7-e01227-s015.pdf [file APS3-7-e01227-s015.pdf]
